1 **Modulation of multiple gene clusters expression by a single PAS-LuxR transcriptional**  
2 **regulator.**

3

4

5 Cláudia M. Vicente<sup>a,b,c</sup>, Tamara D. Payero<sup>a,b</sup>, Antonio Rodríguez-García<sup>a,b</sup>, Eva G. Barreales<sup>a</sup>,  
6 Antonio de Pedro<sup>a</sup>, Fernando Santos-Beneit<sup>b,d</sup> and Jesús F. Aparicio<sup>a,\*</sup>

7

8 <sup>a</sup> *Area of Microbiology, Faculty of Biology, University of León, 24071 León. Spain.*

9 <sup>b</sup> *Institute of Biotechnology INBIOTEC, Parque Científico de León, Avda. Real, nº 1, 24006*  
10 *León, Spain.*

11 <sup>c</sup> *Present address: TBI, CNRS, INRA, INSA, Université de Toulouse, Toulouse, France*

12 <sup>d</sup> *Present address: Institute of Sustainable Processes, University of Valladolid. Spain.*

13

14

15

16

17 \*Corresponding author. Tel:+34-987-293420; Fax:+34-987-291409; e-mail:

18 [jesus.aparicio@unileon.es](mailto:jesus.aparicio@unileon.es)

19

20

21 **ABSTRACT**

22

23 PAS-LuxR transcriptional regulators are highly conserved enzymes governing polyene  
24 macrolide antifungal biosynthesis. PteF is one of such regulators, situated in the polyene  
25 macrolide filipin gene cluster from *Streptomyces avermitilis*. Its mutation leads to a drastic  
26 filipin production decline, but also to a severe loss of oligomycin production, an ATP-synthase  
27 inhibitor of macrolide structure, and a delay in sporulation, thus it has been considered as a  
28 transcriptional activator. Transcriptomic analyses were carried out in *S. avermitilis*  $\Delta$ *pteF* and  
29 its parental strain *S. avermitilis* NRRL 8165 as control. Both strains were grown in YEME  
30 medium without sucrose, and samples were taken in the exponential and stationary growth  
31 phases. 257 genes showed altered expression in the PteF-deleted mutant, most of them in the  
32 exponential phase of growth. Surprisingly, despite PteF being an activator of filipin  
33 biosynthesis, a majority of the genes affected upon mutation showed overexpression thus  
34 suggesting a negative modulation of those genes. Genes affected were related to various  
35 metabolic processes, including genetic information processing; DNA, energy, carbohydrate,  
36 and lipid metabolism; morphological differentiation; and transcriptional regulation; among  
37 others, but particularly to secondary metabolite biosynthesis. Notably, ten secondary metabolite  
38 gene clusters out of 38 encoded by the genome, some of them encoding cryptic compounds,  
39 showed altered expression profiles in the mutant, suggesting a regulatory role for PteF wider  
40 than expected. Transcriptomic results were validated by quantitative reverse transcription  
41 polymerase chain reaction. These findings provide important clues to understand the  
42 intertwined regulatory machinery that modulates antibiotic biosynthesis in *Streptomyces*.

43

44 **KEYWORDS**

45 Antifungal, Gene regulation, LuxR, PAS domain, polyene macrolide, *Streptomyces*

46

47

## 48 INTRODUCTION

49

50 PAS-LuxR regulators are transcriptional factors that combine an N-terminal PAS  
51 sensory domain (Hefti et al., 2004) with a C-terminal helix-turn-helix (HTH) motif of the LuxR  
52 type for DNA-binding (Santos et al., 2012). The sensor domain is thought to detect a physical  
53 or chemical stimulus and regulate, in response, the activity of the effector domain (Möglich et  
54 al., 2009). The archetype of this class of regulators, PimM, was first identified in the antifungal  
55 pimaricin biosynthetic gene cluster from *Streptomyces natalensis* (Antón et al., 2007). It was  
56 characterised as a transcriptional activator of pimaricin biosynthesis since antifungal production  
57 was abolished upon gene deletion, and later its mode of action was characterised at the  
58 molecular level (Santos-Aberturas et al., 2011a). Since its discovery, homologous regulatory  
59 proteins have been found to be encoded in all known biosynthetic gene clusters of antifungal  
60 polyketides, and they have been shown to be functionally equivalent, to the extent that the  
61 production of pimaricin is restored in *S. natalensis*  $\Delta$ *pimM* upon introduction of heterologous  
62 regulators of the PAS-LuxR class, such as *nysRIV* (nystatin), *amphRIV* (amphotericin), or *pteF*  
63 (filipin) into the strain (Santos-Aberturas et al. 2011b). Furthermore, introduction of a single  
64 copy of *pimM* into the amphotericin-producing strain *S. nodosus*, into the filipin-producing  
65 strain *S. avermitilis*, or into the rimocidin producing strain *S. rimosus*, boosted the production  
66 of all polyenes, thus indicating that these regulators are fully exchangeable (Santos-Aberturas  
67 et al. 2011b).

68 Although given their location in the chromosome, PAS-LuxR regulators were initially  
69 considered pathway-specific transcriptional regulators, recent results have shown that they  
70 should be considered as regulators with a wider range of implications. The canonical operator  
71 of PimM was used to search for putative targets of orthologous protein PteF in the genome of  
72 *S. avermitilis*, finding multiple binding sites located inside or upstream from genes involved in  
73 different aspects of both primary and secondary metabolism (Vicente et al., 2015), thus

74 suggesting that the regulator could govern those processes. Several of these operators were  
75 selected, and their binding to PimM DNA-binding domain demonstrated by electrophoretic  
76 mobility shift assays (EMSAs). As a proof of concept, the biosynthesis of the ATP-synthase  
77 inhibitor oligomycin whose gene cluster included two operators was studied (Vicente et al.,  
78 2015). PteF deleted mutants, which showed a severe loss of filipin production and delayed spore  
79 formation in comparison to that of the wild-type strain (Vicente et al 2014), also showed a  
80 severe loss of oligomycin production and reduced expression of *olm* genes. Gene  
81 complementation of the mutant restored phenotype, thus demonstrating that PteF was able to  
82 co-regulate the biosynthesis of two related secondary metabolites, the polyketide macrolides  
83 filipin and oligomycin (Vicente et al., 2015). This cross-regulation could therefore be extended  
84 to all the clusters where operators were found, which suggests that PAS-LuxR regulators may  
85 affect a plethora of processes previously unforeseen. In this sense, the introduction of PAS-  
86 LuxR regulatory genes into different *Streptomyces* hosts has already proven useful for the  
87 awakening of dormant secondary metabolite biosynthetic genes (Olano et al., 2014; Martínez-  
88 Burgo et al., 2019).

89 Here we have used microarrays to study the transcriptome of *S. avermitilis*  $\Delta$ *pteF* mutant  
90 in comparison with that of its parental strain in order to deepen our knowledge about the  
91 processes in which PteF is involved.

92

## 93 MATERIALS AND METHODS

94

### 95 Strains and cultivation

96 *S. avermitilis* NRRL 8165 and its mutant *S. avermitilis*  $\Delta$ *pteF* (Vicente et al., 2014) were  
97 routinely grown in YEME medium (Kieser et al., 2000) without sucrose. Sporulation was  
98 achieved in TBO medium (Higgins et al. 1974) at 30°C.

99

## 100 **Nucleic acid extractions.**

101 RNA was extracted as described elsewhere (Vicente et al., 2014). Briefly, 2 ml from  
102 liquid cultures in YEME medium without sucrose were harvested by centrifugation and  
103 immediately frozen by immersion in liquid nitrogen. Cells were resuspended in lysis solution  
104 [600 µl RLT buffer (RNeasy mini kit; Qiagen); 6 µl 2-mercaptoethanol] and disrupted using  
105 sonicator (Ultrasonic processor XL; Misonix Inc.). RNeasy® Mini kit (Qiagen) was used for  
106 RNA isolation using RNase-Free DNase Set (Qiagen) as specified by manufacturer, followed  
107 by two consecutive digestions with TURBO™ DNase from Ambion® according to the  
108 manufacturer's instructions. Total RNA concentration was determined with a NanoDrop ND-  
109 1000 spectrophotometer (Thermo Scientific), and quality and integrity were checked in a  
110 Bioanalyzer 2100 apparatus (Agilent Technologies). Total genomic DNA (gDNA) was isolated  
111 from stationary phase cultures following the salting-out procedure (Kieser et al., 2000).

112

## 113 **Microarray hybridizations.**

114 The microarray experiment was performed using a common reference design (Gadgil et  
115 al. 2005). The microarray chip Custom Gene Expression Microarray, 8x15K (Agilent) was  
116 customized in order to include different sets of probes as indicated elsewhere (Beites et al.,  
117 2014). For each microarray hybridization, 10 pmol of Cy3-labelled cDNA obtained from total  
118 RNA were mixed with 80 pmol of Cy5-labelled genomic DNA as the common reference.  
119 Labelling, hybridization, washing and scanning conditions were carried out as indicated  
120 previously (Rodríguez-García et al. 2007; Guerra et al., 2012). Three biological replicates from  
121 independent cultures were made for each experimental condition.

122

## 123 **Identification of differentially transcribed genes.**

124 Microarray data were normalized and analysed with the Bioconductor package LIMMA  
125 (Linear Models for Microarray Analysis) (Smyth 2004; Smyth et al. 2005). Spot quality weights

126 were estimated as indicated in the Supplementary section (Tables S1 and S2). Both local and  
127 global normalizations were used (Wu et al., 2005). Firstly, weighted medians of  $\log_2$  Cy3/Cy5  
128 intensities were calculated for print-tip correction and afterwards global Loess was applied  
129 (Smyth and Speed 2003). The normalized  $\log_2$  of Cy3/Cy5 intensities is referred in this work  
130 as the Mg value, which is proportional to the abundance of transcripts for a particular gene  
131 (Mehra et al., 2006). The information from within-array spot duplicates (Smyth et al., 2005)  
132 and empirical array weights (Ritchie et al., 2006) were taken into account in the linear models  
133 (Smyth 2004). The Mg transcription values of the four experimental conditions were compared  
134 using two contrasts, mutant versus wild type, corresponding to the two studied growth phases  
135 (exponential and stationary). For each gene, the Mc value is the binary log of the differential  
136 transcription between the mutant and the wild strain. The Benjamini-Hochberg (BH) false-  
137 discovery rate correction was applied to the  $p$ -values. A positive Mc value indicates  
138 upregulation, and a negative one, downregulation. For each contrast a result was considered as  
139 statistically significant if the BH-corrected  $p$ -value was  $<0.05$ . In certain occasions, however,  
140 when the transcription profile of a gene matched that of genes statistically significant and  
141 functionally related, or for comparison with previous published results obtained by RT-qPCR  
142 or by EMSA assays (Vicente et al., 2014, 2015), we used an uncorrected  $p$ -value with a level  
143 of significance  $<0.05$ .

144 The microarray data are deposited in the National Center for Biotechnology  
145 Information-Gene Expression Omnibus under accession number GSE185887.

146

#### 147 **Assessment of filipin and oligomycin production.**

148 Filipin production was quantified as described elsewhere (Barreales et al., 2020),  
149 whereas oligomycin was measured following the procedure described by Vicente et al (2015).

150

151

## 152 **Reverse transcription-quantitative PCR.**

153 Reverse transcription of total RNA was performed on selected samples with 5 µg of  
154 RNA and 12.5 ng/µl of random hexamer primer (Invitrogen) using SuperScript™ III reverse  
155 transcriptase (Invitrogen) as described previously (Barreales et al., 2018). Reactions were  
156 carried out on two biological replicates with three technical replicates each and appropriate  
157 controls were included to verify the absence of gDNA contamination in RNA and primer-dimer  
158 formation. Primers (see Table S3) were designed to generate PCR products between 97 and 153  
159 bp, near the 5' end of mRNA. The PCR reactions were initiated by incubating the sample at  
160 95°C for 10 min followed by 40 cycles at 95°C for 15 s, 62-70°C (depending of the set of  
161 primers used) for 34 s, and 72 °C for 30 s. To check the specificity of real-time PCR reactions,  
162 a DNA melting curve analysis was performed by holding the sample at 60°C for 60 s followed  
163 by slow ramping of the temperature to 95°C. Baseline and threshold values were determined  
164 by the StepOnePlus software.  $C_t$  values were normalized with respect to *rrnA1* mRNA  
165 (encoding 16S rRNA). Relative changes in gene expression were quantified using the Pfaffl  
166 method (2001) and the REST<sup>®</sup> software (Pfaffl et al., 2002). The corresponding real-time PCR  
167 efficiency (E) of one cycle in the exponential phase was calculated according to the equation  $E$   
168  $= 10^{[-1/\text{slope}]}$  (Rasmussen, 2000) using 5-fold dilutions of genomic DNA ranging from 0.013 to  
169 40 ng (n=5 or 6 with three replicates for each dilution) with a coefficient of determination  $R^2 >$   
170 0.99 (Fig. S1).

171

## 172 **RESULTS AND DISCUSSION**

173

### 174 **Identification of genes with an altered expression profile in *S. avermitilis* $\Delta$ *pteF* mutant.**

175 *S. avermitilis*  $\Delta$ *pteF* and its parental strain *S. avermitilis* NRRL 8165 were grown in  
176 YEME medium without sucrose, and samples were taken at the end of the exponential and at  
177 the middle of the stationary growth phases (Fig. 1). Transcriptomic analysis was performed by

178 microarray hybridization to assess the genes with an altered expression in the mutant when  
179 compared with the parental strain. Genomic DNA was used as a universal reference for all  
180 hybridizations. A result was considered as statistically significant if the BH-corrected  $p$ -value  
181 was  $<0.05$ . It is worth noting that these conditions are quite stringent, given that genes that  
182 constitute direct targets of PteF (e.g. the filipin polyketide synthases *pteA1* and *pteA2*; Vicente  
183 et al., 2014) are not statistically significant. With this criterion, microarrays analysis showed  
184 significant differences (with a fold change above or below  $\pm 2$ ) in the expression of 208 genes  
185 of the *pteF*-negative mutant at the end of the exponential phase, and 99 at the stationary phase  
186 of growth (Table 1; Fig. 2).

187 Surprisingly, the lack of PteF resulted in the overexpression of a majority of the  
188 differentially transcribed genes, at both sampling times, thus indicating that this regulator acts  
189 as a negative modulator for those genes expression. This was unexpected given that PteF is an  
190 activator of both the antifungal filipin (Vicente et al., 2014) and the ATP-synthase inhibitor  
191 oligomycin (Vicente et al., 2015) biosynthesis.

192 These genes were related to different cellular processes, including genetic information  
193 processing; energy, carbohydrate, and lipid metabolism; DNA replication and repair;  
194 morphological differentiation; and transcriptional regulation, among others, but particularly to  
195 secondary metabolite biosynthesis (Table 1).

196

#### 197 Genes involved in genetic information- and protein-processing, and amino acid metabolism.

198 This group includes 24 genes that showed differential transcription in at least one of the  
199 sampling times (Table 1). These genes code for enzymes involved in amino acid metabolism  
200 (7 genes), proteins involved in transcription (8 genes, including 5 sigma factors), the ribosomal  
201 protein L28 (*SAV2675*), two putative acetyltransferases of ribosomal proteins (*SAV703* and  
202 *SAV758*), and enzymes involved in protein processing (5 genes) (Table S4).



203 Interestingly, while sigma factors *sig10* (SAV898), *sig13* (SAV997), and *sig60*  
204 (SAV213), and ribosomal proteins acetyltransferases *SAV703* and *SAV758* showed increased  
205 transcription levels in the mutant, *sig32* (SAV3888), *sig40* (SAV4561), the L28 ribosomal  
206 protein encoding gene *rpmB1*, and the *whiB*-like transcriptional factor *wblE* were clearly  
207 underexpressed in the mutant. The Wbl family of transcriptional factors is exclusive of  
208 actinobacteria and their members have been correlated with diverse roles in morphological  
209 differentiation and secondary metabolism (Fowler-Goldsworthy et al., 2011; Bush 2018).

210 Noteworthy, genes *rocA* (SAV2723) and *putA* (SAV2724), that encode delta-1-pyrroline-  
211 5-carboxylate dehydrogenase and proline dehydrogenase, respectively, and that have been  
212 related to proline catabolism (Menzel and Roth, 1981), and *rocD2* (SAV7112) and *SAV4551*,  
213 which encode putative ornithine aminotransferases, and are also involved in proline metabolism  
214 were underexpressed in the mutant, while *leuB* (SAV2718) which has been involved in valine,  
215 leucine, and isoleucine biosynthesis biosynthesis, *paaI* (SAV1986) that encodes a phenylacetic  
216 acid thioesterase, and putative cysteine desulfurase *SAV1061* were overexpressed.

217

218 Genes involved in nucleotide and vitamin metabolism, and DNA replication, recombination,  
219 and repair.

220 Eighteen genes falling into this category were found to be differentially transcribed in  
221 the mutant (Table 1). Ten of them are involved in DNA replication, recombination and repair.  
222 Of these, seven putative transposases belonging to different families showed enhanced  
223 transcription in the mutant. Additionally, two genes involved in DNA repair, *ku2* (SAV879)  
224 which is probably involved in non-homologous DNA end-joining (Zhang et al., 2012), and  
225 *uvrD1* (SAV3463) that codes for a putative ATP-dependent helicase, were also upregulated.  
226 Conversely, *int12* (SAV4626), which encodes a tyrosine-family recombinase/integrase, showed  
227 reduced transcription levels at stationary phase.

228           The remaining genes were differentially transcribed only in the exponential phase. Four  
229 genes are involved in vitamin metabolism, three of them with lower transcription in the mutant,  
230 including cobalamin methylase *cobJ* (SAV6407) and adenosyltransferase *cobA* (SAV6413), and  
231 alkaline phosphatase *phoA* (SAV5915), which besides being part of the PhoRP two-component  
232 system (Sola-landa et al., 2008) is also involved in folate metabolism. The fourth gene, *thiC*  
233 (SAV4265) is a thiamine biosynthesis protein (Table S4). The rest of the genes are involved in  
234 purine metabolism, including *pgmA*, *purA*, and *purN*, all with enhanced transcription, and *cpdB*,  
235 with lower transcription.

236

#### 237 Carbohydrate metabolism genes.

238           Thirteen genes fall into this category, including four most likely belonging to the same  
239 operon (*SAV1009*, *galE5*, *mpg2*, *SAV1014*) and putatively involved in galactose metabolism,  
240 and showing enhanced transcription in the mutant. Other genes involved in the metabolism of  
241 this sugar were the alpha-galactosidase *agaB1* (SAV1082), which was underexpressed in the  
242 mutant, and the phosphoglucomutase *pgmA* (SAV803), which showed the opposite behavior.  
243 Interestingly, three genes of the tricarboxylic acid/glyoxylate cycle (citrate synthase *citA2*,  
244 citrate lyase *citE2*, and methylmalonyl-CoA mutase *meaA1*) were overexpressed in the mutant  
245 (Table S4).

246

#### 247 Lipid metabolism genes.

248           Nine genes related to lipid metabolism were differentially transcribed. These include  
249 the putative 3-oxoacyl-ACP synthase II *fabB2* (SAV2944), the acyl carrier protein *fabC4*  
250 (SAV217), the enoyl-CoA hydratase *echA1* (SAV492), and the acetyl/propionyl CoA  
251 carboxylase alpha subunit *accA2* (SAV3866), which are all presumably involved in fatty acid  
252 biosynthesis, and the 1-acylglycerol-3-phosphate O-acyltransferase *plsC1* (SAV1485)  
253 putatively involved in glycerophospholipid biosynthesis, among others. Interestingly, all these

254 genes showed increased transcription in the mutant during the exponential phase except *fabB2*  
255 which was underexpressed (Table S4). However, during the stationary phase *fabB2* also showed  
256 enhanced transcription.

257 Noteworthy, the direct binding of the PteF orthologue PimM to the promoters of two of  
258 these genes was already demonstrated (Vicente et al., 2015), thus they have been included in  
259 Table S4 although they did not meet the statistical criteria. These were the acyltransferase *plsC1*  
260 (Yao and Rock 2013) whose transcription was increased in the mutant (Mc 0.88, uncorrected *p*  
261 value 0.0471), and *fabB2* whose transcription was reduced (Mc -0.84, uncorrected *p*-value  
262 0.0410 in t1) or increased (Mc 1.12, *p*-value 0.0048 in t2) depending on the growth phase.

263

#### 264 Energy production genes.

265 Only three genes belonging to this group were found to be differentially transcribed in  
266 the mutant. All of them involved in oxidative phosphorylation and with reduced transcription  
267 in the mutant, two belonging to the operon *nuo* (*nuoJ1* and *nuoK1*), and the ATP synthase *atpF*  
268 (Table S4). Interestingly, all the genes belonging to the *nuo* operon (SAV4837-SAV4850),  
269 although in several cases not meeting the statistical criteria, showed the same decreased  
270 transcription profile in the mutant.

271

#### 272 Transport and external signals processing.

273 This group includes 25 genes that showed differential transcription in at least one of the  
274 sampling times (Table 1). Interestingly, twelve of them code or participate in the formation of  
275 ATP-binding cassette transporters (Table S4). Of these, four are putatively involved in sugar  
276 transport (*SAV1804*, *SAV2246*, *SAV2247*, and *SAV2609*) and showed reduced transcription in  
277 the mutant.

278 Four transporters belonging to the major facilitator superfamily showed differential  
279 transcription in the mutant, *SAV2455* with reduced transcription, and *SAV610*, the sulfate  
280 transporter *SAV4600*, and *SAV6941* with enhanced transcription.

281 Noteworthy, in agreement with the enhanced transcription of *SAV610*, the genes *fecC1*  
282 (*SAV600*) and *fecB* (*SAV602*) which constitute part of a putative ABC transporter  
283 iron(III)/siderophore transport system were also overexpressed. Based on protein similarity,  
284 *SAV600-602* could constitute an ABC transport system homologous to the system FecBCD  
285 from *E. coli* involved in iron dicitrate transport (Staudenmaier et al., 1989). *SAV602* and  
286 *SAV610* genes flank a gene cluster involved in the biosynthesis of the siderophore *nrp6* whose  
287 expression is also upregulated in the mutant (see below and Tables 2 and S4). Altogether these  
288 results suggest that the ABC system *SAV600-602* and the transporter *SAV610*, would be  
289 involved in iron transport using the siderophore *nrp6*. These transcriptomic results are further  
290 supported by the direct binding of PimM to the promoters of *SAV602* and *SAV610* (Vicente et  
291 al., 2015).

292

### 293 Genes involved in cell envelope biosynthesis and morphological differentiation.

294 This group includes eleven genes that showed differential transcription in at least one  
295 of the sampling times. These genes code for enzymes involved in cell envelope biosynthesis  
296 (the N-acetylmuramoyl-L-alanine amidase *ampD1*), and morphological differentiation (8  
297 genes). The latter are particularly interesting because in *Streptomyces* morphological  
298 differentiation is usually accompanied by physiological differentiation (McCormick and  
299 Flärdh, 2012). The differential expression of genes involved in morphological differentiation  
300 was somehow expected given that *S. avermitilis* *ApteF* mutants show a delay in spore formation  
301 (Vicente et al., 2014).

302 Our results indicate that the transcriptional regulators *wlbE* and *bldC* that are associated  
303 to deficient phenotypes in spore formation (*white*) and in aerial mycelium development (*bald*),

304 respectively, are underexpressed in the mutant. Similarly, the secreted subtilisin inhibitor *sit2*  
305 involved in morphological differentiation via *sigU* in *S. coelicolor* (Gordon et al., 2008), and  
306 *SAV2505* that encodes a DNA-binding protein orthologous to *S. lividans* transcriptional  
307 regulator ClgR which controls the expression of ATP-dependent protease Clp involved in  
308 morphological differentiation (Bellier et al., 2006), are also downregulated (Table S4).  
309 Interestingly, *clpC1* gene had also been proposed as direct PteF molecular target given PimM  
310 binding to its coding region (Vicente et al., 2015).

311 Conversely, the gene *ctpB* that encodes a cation-transporting P-type ATPase involved  
312 in *Bacillus subtilis* sporulation activation (Campo and Rudner, 2007), the gene *mreC* needed  
313 for spore cell-wall synthesis in *S. coelicolor* (Kleinschnitz et al., 2011), and both *kipI*, and its  
314 antagonist *kipA*, which have been involved in sporulation control in *B. subtilis* (Wang et al.,  
315 1997; Jacques et al., 2011), showed enhanced transcription in the mutant (Table S4).

316

### 317 Regulatory genes.

318 As described here, a large set of genes with diverse functions are under the control of  
319 PteF, including several regulatory genes listed in the categories described above. This prompted  
320 us to analyze other possible transcriptional regulators differentially expressed in the mutants,  
321 as these could be mediators of the regulatory control. A complete list of regulatory genes whose  
322 expression is affected in the mutant is presented in Table S4.

323 A total of 31 transcriptional regulators showed a significant differential transcription in  
324 the mutant when compared with the parental strain. Such a large number reflects the pleiotropic  
325 nature of PAS-LuxR regulators (Vicente et al., 2014, 2015; Aparicio et al., 2016), and probably  
326 justifies all the biological processes affected by the mutation (see functional categories listed  
327 above).

328 Among the regulators controlled by PteF, is interesting to highlight eight directly  
329 involved in diverse secondary metabolites biosynthesis control, namely: *avaL2* (*SAV2268*) and

330 *avaL1* (SAV2270), both TetR-family regulators putatively involved in the biosynthesis of a  $\gamma$ -  
331 butyrolactone (Ikeda et al., 2014); *avaR1* (SAV3705), which encodes the avenolide receptor  
332 protein (Kitani et al., 2011; Wang et al., 2014; Zhu et al., 2016); *olmR11* (SAV2901) and *olmR1*  
333 (SAV2902), both LuxR-family positive regulators of macrolide oligomycin biosynthesis (Yu et  
334 al., 2012); *pteR* (SAV410), the SARP-LAL regulator of the polyene macrolide filipin  
335 biosynthesis (Ikeda et al., 2014; Vicente et al., 2014; Payero et al., 2015); *aveR* (SAV935), a  
336 LAL-family positive regulator of avermectin biosynthesis (Kitani et al., 2009); and SAV2989,  
337 a MarR-family transcriptional regulator from the neopentalenolactone biosynthetic cluster  
338 (Ikeda et al., 2014). All these regulatory genes showed decreased transcription in the mutant,  
339 except for *pteR* and *aveR* that were overexpressed (Tables 2 and S4).

340 Interestingly, the expression of *olmR1* and *olmR11* genes had already been proven to be  
341 negatively affected by the lack of PteF (Vicente et al., 2015). Furthermore, *pteF*-deletion  
342 mutants showed a severe loss of oligomycin production, whereas gene complementation of the  
343 mutant restored parental-strain phenotype, and gene duplication in the wild-type strain boosted  
344 oligomycin production (Vicente et al., 2015). Similarly, *pteR* has also been reported as a PteF  
345 molecular target, via the action of another hierarchical regulator which would be activated by  
346 PteF (Vicente et al., 2014).

347 Besides the abovementioned regulators, it is also noteworthy the identification of  
348 SAV2301, that codes for a RedD orthologue, the transcriptional activator of the  
349 undecylprodigiosin pathway in *S. coelicolor* (Narva and Feitelson, 1990), *bldC* (SAV4130), a  
350 MerR-family regulator involved in morphological differentiation and secondary metabolite  
351 production in *S. coelicolor* (Hunt et al., 2005), and *cutS* (SAV2404), a sensor kinase involved  
352 in actinorhodin biosynthesis in *S. lividans* (Chang et al., 1996), all of them being down-  
353 regulated in the mutant (Table S4).

354

355

356 Secondary metabolite genes.

357       The functional group more clearly affected by *pteF* deletion was that of genes involved  
358 in secondary metabolite biosynthesis (Table 1). In this category, when one or more genes  
359 critical for metabolite biosynthesis were found statistically significant, the transcription of other  
360 genes belonging to the same cluster with uncorrected p-values < 0.05 was also considered  
361 significant. Following this broader criterion, sixty one genes belonging to this group, regardless  
362 of regulatory genes mentioned above, showed a significant differential transcription in the  
363 mutant when compared with the parental strain in at least one of the sampling times (Table S4).  
364 Noteworthy, almost all genes were detected at the exponential growth-phase. In particular,  
365 those related to secondary metabolism precursor biosynthesis were only detected at this  
366 sampling time. These were: the ornithine aminotransferases *rocD3* (SAV2285) and *rocD2*  
367 (SAV7112), and the proline dehydrogenase *putA* (SAV2724), which were underexpressed; and  
368 the phosphoglucomutase *pgmA* (SAV803), the 3-isopropylmalate dehydrogenase *leuB*  
369 (SAV2718), the phosphoribosylglycinamide formyltransferase *purN* (SAV3445), and the  
370 putative citrate synthase *citA2* (SAV3859), which were overexpressed.

371       But the most striking results of microarray analyses were the identification of  
372 differential transcription in 67 genes (including regulatory genes) belonging to 10 out of the 38  
373 putative secondary metabolite gene clusters encoded by *S. avermitilis* genome (Ikeda et al.,  
374 2014). Table 2 includes the transcriptional values of genes belonging to differentially expressed  
375 secondary metabolite gene clusters. For gene cluster boundaries definition we used StrepDB  
376 database (<http://strepdb.streptomyces.org.uk>) in conjunction with information described by  
377 Ikeda et al. (2014).

378       The secondary metabolites whose biosynthesis would be affected by *pteF* deletion were  
379 of different nature, and included: the polyketides filipin (*pte*), oligomycin (*olm*), avermectin  
380 (*ave*), and the product of *pks3*; the non-ribosomal peptides *nrp3* and the siderophore *nrp6*; the



381 vibrioferrin-like polyhydroxycarboxylate siderophore *avs*; the terpenoid  
382 neopentalenoketolactone (*ptl*); the  $\gamma$ -butyrolactone (*gbl*); and melanin (*melC-1*).

383 In all these clusters, the differential transcription of at least one key biosynthetic gene  
384 was observed. The number of genes affected were: eleven in the *nrp6* cluster (out of 12), ten  
385 (out of 13 and 14 respectively) in the case of the filipin and oligomycin clusters, eight (out of  
386 11) in the case of the *pk3* cluster, seven in the case of the avermectin (out of 19) cluster, six in  
387 the *nrp3* cluster (out of 10), six in the *ptl* cluster (out of 14), five (out of 5) in the *gbl* cluster,  
388 and two in the *avs* (out of 4) and melanin *melC-1* (out of 2) clusters (Table 2).

389 Furthermore, a closer look at the transcription of the remaining genes of each of these  
390 clusters revealed that most of the genes of a given cluster, followed the same tendency. Figure  
391 3 shows the transcription profiles of secondary metabolite gene clusters genes affected by the  
392 mutation including regulatory genes, and Table 2 the transcription values observed for each of  
393 the genes.

394 Seven of the secondary metabolite gene clusters showed an overall reduced  
395 transcription, including filipin *pte*, oligomycin *olm*, neopentalenoketolactone *ptl*, and melanin  
396 *melC-1* clusters, the silent cluster for  $\gamma$ -butyrolactone *gbl*, and the cryptic gene clusters *pk3* and  
397 *nrp3*. On the opposite, three gene clusters showed overall enhanced transcription, including the  
398 macrolide avermectin *ave*, the siderophore *avs*, and the cryptic non-ribosomal peptide *nrp6*  
399 (Fig. 3).

400 Interestingly, besides the genes mentioned above, all the genes belonging to the clusters  
401 coding for the terpenoid albaflavenol/albaflavenone (*ezs*), and the cryptic polyketide *pk4* also  
402 followed the same tendency. In these cases, transcription values did not meet the statistical  
403 criteria, but their uncorrected *p*-values were < 0.05 in all instances (Table 2). In the case of the  
404 *ezs* genes (SAV3031-3032) they showed an average of two fold more transcription in the  
405 mutant, whereas *pk4* genes (SAV7184-7186) showed between 7 and 9 fold less transcription  
406 than in the parental strain.



407

408 **Filipin and Oligomycin production are strongly reduced in *S. avermitilis*  $\Delta$ *pteF*.**

409         Although many of the metabolites whose biosynthesis would be affected by *pteF*  
410 deletion are of unknown structure (cryptic) and others are not produced under laboratory  
411 conditions (silent) (Ikeda et al., 2014), the production of two of them could be readily monitored  
412 in *S. avermitilis*  $\Delta$ *pteF*. These were the antifungal pentaene filipin which is encoded by the *pte*  
413 cluster where the regulator is situated, and the ATP-synthase inhibitor oligomycin which is  
414 encoded by the *olm* cluster (Fig. 1). In both cases, production of the secondary metabolite was  
415 strongly reduced upon inactivation of the regulatory gene *pteF*. This is in agreement with the  
416 reduced transcription of most biosynthetic genes of both clusters (Fig. 3). The exceptions were  
417 the discrete thioesterase *pteH*, the cholesterol oxidase *pteG*, and the SARP-LAL regulator *pteR*  
418 of the filipin cluster, which were overexpressed. These results corroborate our previous  
419 observations by RT-qPCR (Vicente et al., 2014; Vicente et al., 2015).

420

421 **Validation of microarray results by using quantitative RT-PCR.**

422         Quantitative RT-PCR was used on reversed transcribed RNA samples to confirm that  
423 differential expression indicated by the microarray data was supported by an independent  
424 method. The selected genes covered a wide range of expression, including up-regulation and  
425 down-regulation. Twelve genes were validated including genes for the biosynthesis of filipin  
426 (*pteC*, *pteB*, *pteR*, *pteG*), oligomycin (*olmRI*, *olmRII*, *olmB*), avermectin (*aveR*), the isomerase  
427 of *pk3* cluster (*SAV2273*), one ABC transporter of the *nrp6* cluster (*fecB*), the alpha  
428 galactosidase *agaBI*, and the heat shock internal membrane protease *htpXI* (*SAV4891*).

429         Overall, the RT-qPCR data and microarray data showed a good concordance (Fig. S2).  
430 The range of dynamics for relative log<sub>2</sub> fold change obtained from RT-qPCRs (-6.53 to +7.54)  
431 was higher than that obtained from Mc values from microarrays (-7.24 to +2.94), indicating  
432 that RT-qPCRs are more sensitive. This probably reflects on the Pearson's correlation

433 coefficient ( $R^2$ ) for the plot, resulting in a lower value than what could be expected.  
434 Nevertheless, the obtained value ( $R^2 = 0.892$ ) still indicates a good correlation of results.

435

#### 436 **Concluding remarks.**

437

438 Up to date, PAS-LuxR regulator-encoding genes have been found only in polyene  
439 macrolide gene clusters, thus constituting a landmark of these type of clusters. In this context,  
440 they are transcriptional activators essential for the biosynthesis of the polyene encoded within  
441 the cluster. Their expression is a bottleneck in the biosynthesis of the antifungal and thus  
442 polyene production is easily incremented upon gene dosage increase (Aparicio et al., 2016).  
443 Additionally, heterologous gene complementation of mutants restores strain ability to produce  
444 the antifungal compound, thus proving that these regulators are highly conserved (Santos-  
445 Aberturas et al. 2011b). Recently, we have obtained evidence indicating that although these  
446 regulators were initially thought to be pathway-specific, they actually are regulatory proteins  
447 with a wider range of connotations in addition to polyene biosynthesis. Thus, PteF, the regulator  
448 of filipin biosynthesis, was proven to control oligomycin production in *S. avermitilis* (Vicente  
449 et al., 2015). This prompted us to propose that introduction of PAS-LuxR regulatory genes into  
450 *Streptomyces* species could prove useful for the awakening of dormant secondary metabolite  
451 biosynthetic genes (Vicente et al., 2014; 2015). This hypothesis was confirmed when PimM,  
452 the archetype of PAS-LuxR regulators was introduced into *S. albus* J1074, and production of  
453 the hybrid non ribosomal peptide-polyketide antimycin was activated (Olano et al., 2014).  
454 Recently, a similar result has been described in *S. albus* S4, where a PimM orthologue (the  
455 candidin regulator FscRI) has been identified as required for antimycin production (McLean  
456 et al., 2016).

457 Here we have studied the transcriptome of *S. avermitilis*  $\Delta$ *pteF* mutant in comparison  
458 with that of its parental strain. Our results corroborate our previous observations (Vicente et al.,

459 2014, 2015), reinforcing the idea that PAS-LuxR regulators control many different cellular  
460 processes of bacterial metabolism at the transcriptional level, but in particular stress the  
461 importance of PAS-LuxR involvement on secondary metabolite biosynthesis.

462 Notably, ten (or twelve if we include *ezs* and *pk4* gene clusters) out of the 38 putative  
463 secondary metabolite gene clusters encoded by *S. avermitilis* genome (Ikeda et al., 2014)  
464 showed altered expression in the mutant. In some instances, the modified expression of  
465 biosynthetic genes of a given cluster could be explained by the effect of the mutation on the  
466 expression of one or more cluster-situated regulators. This is the case of the *aveR* regulator of  
467 the avermectin *ave* cluster, the regulators *avaL1* and *avaL2* of the  $\gamma$ -butyrolactone *gbl* cluster,  
468 the oligomycin regulators *olmRI* and *olmRII*, and the MarR regulator (*SAV2989*) of the  
469 pentalenolactone *ptl* cluster. AveR, the transcriptional activator of avermectin biosynthesis  
470 (Kitani et al., 2009), is overexpressed four-fold in the mutant and concomitantly the remaining  
471 genes of the *ave* cluster showed enhanced transcription. Conversely, *OlmRI* and *OlmRII*,  
472 positive regulators of oligomycin biosynthesis (Yu et al., 2012), showed decreased transcription  
473 in the mutant (Mc values -1.56 and -1.47 respectively), and so did the remaining genes of the  
474 cluster. It is not known whether *AvaL1* and *AvaL2* are positive regulators, but it is conceivable  
475 given that they show reduced transcription values upon mutation of the *pteF* gene (fold changes  
476 of 6.4 and 8.9, respectively) together with the remaining genes of the *gbl* cluster, including the  
477  $\gamma$ -butyrolactone synthase *avaA*. Both *AvaL1* and *AvaL2* show convincing similarity to  $\gamma$ -  
478 butyrolactone receptor proteins, and although these proteins normally act repressing  
479 transcription of the synthase gene (Zou et al., 2014; Zhou et al., 2015; Barreales et al., 2020),  
480 there are cases that display the opposite behavior, like *FarA* from *S. lavendulae* that activates  
481 the transcription of the synthase *farX* (Kitani et al., 2010). The same occurs with the MarR  
482 regulator of the *ptl* cluster (Ikeda et al., 2014) whose transcription is diminished (2-fold) in the  
483 mutant as well as that of all *ptl* genes. In the remaining gene clusters there are no cluster-situated  
484 regulatory genes, thus the effect of the mutation must be explained either by a direct action of

485 PteF on key biosynthetic genes or via the action of other regulatory genes. In this sense, 28  
486 regulatory genes not situated in the clusters indicated above, most of them with unknown  
487 function, were differentially expressed upon mutation of *pteF* (Table S4).

488 To our knowledge, this is the second time a genome-wide transcriptomic study is  
489 conducted to describe the pleiotropic nature of a cluster-situated regulator, that of the regulator  
490 of lincomycin biosynthesis LmbU from *S. linconensis* (Li et al., 2020). Cross-regulation of  
491 disparate natural-product biosynthetic gene clusters by a cluster-situated regulator has already  
492 been described by several groups although not in genome-wide studies (Santamarta et al., 2011;  
493 Vicente et al., 2015; McLean et al., 2016). Moreover, the ability of some of these regulators to  
494 modulate the effects of regulators that act more globally (Huang et al., 2005), as well as the  
495 competition between global regulators (Santos-Beneit et al., 2009), have also been reported.  
496 Our findings go beyond, and indicate that PAS-LuxR regulators should be considered wide  
497 domain regulators. They affect the expression of multiple genes involved in both primary and  
498 secondary metabolism.

499 The findings reported here should provide important clues to understand the intertwined  
500 regulatory machinery that modulates antibiotic biosynthesis in *Streptomyces*, and suggest that  
501 the heterologous expression of PAS-LuxR regulators is likely to represent a powerful general  
502 strategy for novel bioactive natural product discovery.

503

## 504 **ACKNOWLEDGEMENTS**

505

506 This work was supported by the Spanish Ministerio de Economía y Competitividad (Grant  
507 BIO2013-42983-P to JFA), F.P.U. fellowships of the Ministerio de Educación, Cultura y  
508 Deporte (AP2007-02055 to TDP, FPU13/01537 to AP), a contract from the Junta de Castilla y  
509 León co-financed by the European Social Fund (to EGB), and a fellowship from the Portuguese  
510 Fundação para a Ciência e a Tecnologia (SFRH/BD/64006/2009 to CMV).

511

512 **CONFLICT OF INTEREST:**

513

514 The authors declare that they have no conflict of interest.

515

516 **REFERENCES**

517

518 Antón N, Santos-Aberturas J, Mendes MV, Guerra SM, Martín JF, Aparicio JF. 2007. PimM,  
519 a PAS domain positive regulator of pimarinic acid biosynthesis in *Streptomyces natalensis*.  
520 *Microbiology* 157, 3174-3183. doi: 10.1099/mic.0.2007/009126-0

521 Aparicio JF, Barreales EG, Payero TD, Vicente CM, de Pedro A, Santos-Aberturas J. 2016.  
522 Biotechnological production and application of the antibiotic pimarinic acid: biosynthesis and  
523 its regulation. *Appl Microbiol Biotechnol* 100, 61-78. doi: 10.1007/s00253-015-7077-0

524 Barreales EG, Payero TD, Jambrina E, Aparicio JF. 2020. The gamma-butyrolactone system  
525 from *Streptomyces filipinensis* reveals novel clues to understand secondary metabolism  
526 control. *Appl Environ Microbiol* 86, e00443-20. doi: 10.1128/AEM.00443-20

527 Barreales EG, Vicente CM, de Pedro A, Santos-Aberturas J, Aparicio JF. 2018. Promoter  
528 engineering reveals the importance of heptameric direct repeats for DNA-binding by  
529 SARP-LAL regulators in *Streptomyces natalensis*. *Appl Environ Microbiol* 84, e00246-  
530 18. doi: 10.1128/AEM.00246-18

531 Beites T, Rodríguez-García A, Santos-Beneit F, Moradas-Ferreira P, Aparicio JF, Mendes MV.  
532 2014. Genome-wide analysis of the regulation of pimarinic acid production in *Streptomyces*  
533 *natalensis* by reactive oxygen species. *Appl Microbiol Biotechnol* 98, 2231–2241. doi:  
534 10.1007/s00253-013-5455-z

535 Bellier A, Gominet M, Mazodier P. 2006. Post-translational control of the *Streptomyces*  
536 *lividans* ClgR regulon by ClpP. *Microbiology* 152, 1021-1027. doi: 10.1099/mic.0.28564-  
537 0

538 Bush M. 2018. The actinobacterial WhiB-like (Wbl) family of transcription factors. *Mol*  
539 *Microbiol* 110, 663-676. doi: 10.1111/mmi.14117

540 Campo N, Rudner DZ. 2007. SpoIVB and CtpB are both forespore signals in the activation of  
541 the sporulation transcription factor sigmaK in *Bacillus subtilis*. *J Bacteriol* 189, 6021–  
542 6027. doi: 10.1128/JB.00399-07

543 Chang HM, Chen MY, Shieh YT, Bibb MJ, Chen CW. 1996. The *cutRS* signal transduction  
544 system of *Streptomyces lividans* represses the biosynthesis of the polyketide antibiotic  
545 actinorhodin. *Mol Microbiol* 21, 1075-1085.

546 Fowler-Goldsworthy K, Gust B, Mouz S, Chandra G, Findlay KC, Chater KF. 2011. The  
547 actinobacteria-specific gene *wblA* controls major developmental transitions in  
548 *Streptomyces coelicolor* A3(2). *Microbiology* 157, 1312–1328. doi:  
549 10.1099/mic.0.047555-0

- 550 Gadgil M, LianW, Gadgil C, Kapur V, HuWS. 2005. An analysis of the use of genomic DNA  
551 as a universal reference in two channel DNA microarrays. *BMC Genomics* 6, 66.  
552 doi:10.1186/1471-2164-6-66
- 553 Gordon ND, Ottaviano GL, Connell SE, Tobkin GV, Son CH, Shterental S, Gehring AM. 2008.  
554 Secreted-protein response to sigmaU activity in *Streptomyces coelicolor*. *J Bacteriol* 190,  
555 894–904. doi: 10.1128/JB.01759-07
- 556 Guerra SM, Rodríguez-García A, Santos-Aberturas J, Vicente CM, Payero TD, Martín JF,  
557 Aparicio JF. 2012. LAL regulators SCO0877 and SCO7173 as pleiotropic modulators of  
558 phosphate starvation response and actinorhodin biosynthesis in *Streptomyces coelicolor*.  
559 *PLoS One* 7, e31475. doi: 10.1371/journal.pone.0031475
- 560 Hefti MH, Francoijs K-J, de Vries SC, Dixon R, Vervoort J. 2004. The PAS fold. A redefinition  
561 of the PAS domain based upon structural prediction. *Eur J Biochem* 271, 1198-1208. doi:  
562 10.1111/j.1432-1033.2004.04023.x
- 563 Higgens CE, Hamill RL, Sands TH, Hoehn MM, Davis NE. 1974. The occurrence of  
564 deacetoxycephalosporin C in fungi and streptomycetes. *J Antibiot* 27, 298-300.
- 565 Huang J, Shi J, Molle V, Sohlberg B, Weaver D, Bibb MJ, Karoonuthaisiri N, Lih CJ, Kao CM,  
566 Buttner MJ, Cohen SN. 2005. Cross-regulation among disparate antibiotic biosynthetic  
567 pathways of *Streptomyces coelicolor*. *Mol Microbiol* 58:1276–1287. doi:10.1111/j.1365-  
568 2958.2005.04879.x
- 569 Hunt AC, Servín-González L, Kelemen GH, Buttner MJ. 2005. The *bldC* developmental locus  
570 of *Streptomyces coelicolor* encodes a member of a family of small DNA-binding proteins  
571 related to the DNA-binding domains of the MerR family. *J Bacteriol* 187, 716-728. doi:  
572 10.1128/JB.187.2.716-728.2005
- 573 Ikeda H, Shin-ya K, Omura S. 2014. Genome mining of the *Streptomyces avermitilis* genome  
574 and development of genome-minimized hosts for heterologous expression of biosynthetic  
575 gene clusters. *J Ind Microbiol Biotechnol* 41, 233-250. doi: 10.1007/s10295-013-1327-x
- 576 Jacques DA, Langley DB, Hynson RMG, Whitten AE, Kwan A, Guss JM, Trehwella J. 2011.  
577 A novel structure of an antikinase and its inhibitor. *J Mol Biol* 405, 214–226. doi:  
578 10.1016/j.jmb.2010.10.047
- 579 Kieser T, Bibb MJ, Buttner MJ, Chater KF, Hopwood DA. 2000. *Practical Streptomyces*  
580 genetics. John Innes Foundation, Norwich
- 581 Kitani S, Ikeda H, Sakamoto T, Noguchi S, Nihira T. 2009. Characterization of a regulatory  
582 gene, *aveR*, for the biosynthesis of avermectin in *Streptomyces avermitilis*. *Appl Microbiol*  
583 *Biotechnol* 82, 1089-1096. doi: 10.1007/s00253-008-1850-2
- 584 Kitani S, Doi M, Shimizu T, Maeda A, Nihira T. 2010. Control of secondary metabolism by  
585 *farX*, which is involved in the gamma-butyrolactone biosynthesis of *Streptomyces*  
586 *lavendulae* FRI-5. *Arch Microbiol* 192, 211-220. doi: 10.1007/s00203-010-0550-3.
- 587 Kitani S, Miyamoto KT, Takamatsu S, Herawati E, Iguchi H, Nishitomi K, Uchida M,  
588 Nagamitsu T, Omura S, Ikeda H, Nihira T. 2011. Avenolide, a *Streptomyces* hormone  
589 controlling antibiotic production in *Streptomyces avermitilis*. *Proc Natl Acad Sci U S A*.  
590 108, 16410-16415. doi: 10.1073/pnas.1113908108
- 591 Kleinschnitz E-M, Heichlinger A, Schirner K, Winkler J, Latus A, Maldener I, Wohlleben W,  
592 Muth G. 2011. Proteins encoded by the *mre* gene cluster in *Streptomyces coelicolor* A3(2)



- 593 cooperate in spore wall synthesis. *Mol Microbiol* 79, 1367–1379. doi: 10.1111/j.1365-  
594 2958.2010.07529.x
- 595 Martínez-Burgo Y, Santos-Aberturas J, Rodríguez-garcía A, Barreales EG, Tormo JR, Truman  
596 AW, Reyes F, Aparicio JF, Liras P. 2019. Activation of Secondary Metabolite Gene  
597 Clusters in *Streptomyces clavuligerus* by the PimM Regulator of *Streptomyces natalensis*.  
598 *Front Microbiol*; 10:580. doi: 10.3389/fmicb.2019.00580
- 599 McCormick JR, Flärdh K. 2012. Signals and regulators that govern *Streptomyces* development.  
600 *FEMS Microbiol Rev* 36, 206–231. doi: 10.1111/j.1574-6976.2011.00317.x
- 601 McLean TC, Hoskisson PA, Seipke RF. 2016. Coordinate regulation of antimycin and  
602 candididin biosynthesis. *mSphere* 1:e00305-16. doi: 10.1128/mSphere.00305-16.
- 603 Mehra S, Lian W, Jayapal KP, Charaniya SP, Sherman DH, Hu WS. 2006. A framework to  
604 analyze multiple time series data: A case study with *Streptomyces coelicolor*. *J Ind*  
605 *Microbiol Biotechnol* 33, 159–172. doi: 10.1007/s10295-005-0034-7
- 606 Menzel R, Roth J. 1981. Purification of the *putA* gene product. A bifunctional membrane-bound  
607 protein from *Salmonella typhimurium* responsible for the two-step oxidation of proline to  
608 glutamate. *J Biol Chem* 256, 9755–9761.
- 609 Möglichen A, Ayers RA, Moffat K. 2009. Structure and signaling mechanism of Per-ARNT-Sim  
610 domains. *Structure* 17, 1282–1294. doi: 10.1016/j.str.2009.08.011
- 611 Narva KE, Feitelson JS. 1990. Nucleotide sequence and transcriptional analysis of the *redD*  
612 locus of *Streptomyces coelicolor* A3(2). *J Bacteriol* 172, 326–333.
- 613 Olano C, García I, González A, Rodríguez M, Rozas D, Rubio J, Sánchez-Hidalgo M, Braña  
614 AF, Méndez C, Salas JA. 2014. Activation and identification of five clusters for secondary  
615 metabolites in *Streptomyces albus* J1074. *Microb Biotechnol* 7, 242–256. doi:  
616 10.1111/1751-7915.12116
- 617 Payero TD, Vicente CM, Rumbero Á, Barreales EG, Santos-Aberturas J, de Pedro A, Aparicio  
618 JF. 2015. Functional analysis of filipin tailoring genes from *Streptomyces filipinensis*  
619 reveals alternative routes in filipin III biosynthesis and yields bioactive derivatives. *Microb*  
620 *Cell Fact* 14:114. doi: 10.1186/s12934-015-0307-4.
- 621 Pfaffl MW. 2001. A new mathematical model for relative quantification in real-time RT-PCR.  
622 *Nucleic Acids Res* 29, e45. doi:10.1093/nar/29.9.e45
- 623 Pfaffl, M.W., Horgan, G.W., Dempfle, L. 2002. Relative expression software tool (REST) for  
624 group-wise comparison and statistical analysis of relative expression results in real-time  
625 PCR. *Nucleic Acids Res* 30, e36. doi: 10.1093/nar/30.9.e36
- 626 Rasmussen, R. 2000. Quantification on the LightCycler. In: Meuer S, Wittwer C, Nakagawara  
627 K, editors. *Rapid Cycle Real-Time PCR, Methods and Applications*. Springer Press,  
628 Heidelberg. pp. 21–34.
- 629 Ritchie M, Diyagama D, Neilson J, van Laar R, Dobrovic A, Holloway A, Smyth GK. 2006.  
630 Empirical array quality weights in the analysis of microarray data. *BMC Bioinformatics* 7,  
631 261. doi: 10.1186/1471-2105-7-261
- 632 Rodríguez-García A, Barreiro C, Santos-Beneit F, Sola-Landa A, Martín JF. 2007. Genome-  
633 wide transcriptomic and proteomic analysis of the primary response to phosphate limitation  
634 in *Streptomyces coelicolor* M145 and in a DeltaphoP mutant. *Proteomics* 7, 2410–2429.  
635 doi:10.1002/pmic.200600883

- 636 Santos CL, Correia-Neves M, Moradas-Ferreira P, Mendes MV. 2012. A walk into the LuxR  
637 regulators of Actinobacteria: phylogenomic distribution and functional diversity. *PLoS*  
638 *One* 7:e46758. doi: 10.1371/journal.pone.0046758
- 639 Santos-Aberturas J, Vicente CM, Guerra SM, Payero TD, Martín JF, Aparicio JF. 2011a.  
640 Molecular control of polyene macrolide biosynthesis: direct binding of the regulator PimM  
641 to eight promoters of pimaricin genes and identification of binding boxes. *J Biol Chem*  
642 286, 9150-9161. doi: 10.1074/jbc.M110.182428
- 643 Santos-Aberturas J, Payero TD, Vicente CM, Guerra SM, Cañibano C, Martín JF, Aparicio JF.  
644 2011b. Functional conservation of PAS-LuxR transcriptional regulators in polyene  
645 macrolide biosynthesis. *Metab Eng* 13, 756-767. doi: 0.1016/j.ymben.2011.09.011
- 646 Santos-Beneit F, Rodríguez-García A, Sola-Landa A, Martín JF. 2009. Cross-talk between two  
647 global regulators in *Streptomyces*: PhoP and AfsR interact in the control of *afsS*, *pstS* and  
648 *phoRP* transcription. *Mol Microbiol* 72, 53-68. doi: 10.1111/j.1365-2958.2009.06624.x.
- 649 Smyth GK. 2004. Linear models and empirical bayes methods for assessing differential  
650 expression in microarray experiments. *Stat Appl Genet Mol Biol* 3, 3. doi:10.2202/1544-  
651 6115.1027
- 652 Smyth GK, Michaud J, Scott HS. 2005. Use of within-array replicate spots for assessing  
653 differential expression in microarray experiments. *Bioinformatics* 21, 2067–2075.  
654 doi:10.1093/bioinformatics/bti270
- 655 Smyth GK, Speed TP. 2003. Normalization of cDNA microarray data. *Methods* 31, 265–273.  
656 doi:10.1016/S1046-2023(03)00155-5
- 657 Sola-Landa A, Rodríguez-García A, Apel AK, Martín JF. 2008. Target genes and structure of  
658 the direct repeats in the DNA-binding sequences of the response regulator PhoP in  
659 *Streptomyces coelicolor*. *Nucleic Acids Res* 36, 1358-1368. doi: 10.1093/nar/gkm1150.
- 660 Staudenmaier H, Van Hove B, Yaraghi Z, Braun V. 1989. Nucleotide sequences of the  
661 *fecBCDE* genes and locations of the proteins suggest a periplasmic-binding-protein-  
662 dependent transport mechanism for iron(III) dicitrate in *Escherichia coli*. *J Bacteriol* 171,  
663 2626-2633. doi: 10.1128/jb.171.5.2626-2633.1989
- 664 Vicente CM, Santos-Aberturas J, Payero TD, Barreales EG, de Pedro A, Aparicio JF. 2014.  
665 PAS-LuxR transcriptional control of filipin biosynthesis in *S. avermitilis*. *Appl. Microbiol.*  
666 *Biotechnol* 98, 9311-9324. doi: 10.1007/s00253-014-5998-7
- 667 Vicente CM, Payero TD, Santos-Aberturas J, Barreales EG, de Pedro A, Aparicio JF. 2015.  
668 Pathway-specific regulation revisited: cross-regulation of multiple disparate gene clusters  
669 by PAS-LuxR transcriptional regulators. *Appl Microbiol Biotechnol* 99, 5123-5135. doi:  
670 10.1007/s00253-015-6472-x
- 671 Wang L, Grau R, Perego M, Hoch JA. 1997. A novel histidine kinase inhibitor regulating  
672 development in *Bacillus subtilis*. *Genes Dev* 11, 2569–2579. doi: 10.1101/gad.11.19.2569
- 673 Wang JB, Zhang F, Pu JY, Zhao J, Zhao QF, Tang GL. 2014. Characterization of AvaR1, an  
674 autoregulator receptor that negatively controls avermectins production in a high  
675 avermectin-producing strain. *Biotechnol Lett* 36, 813-819. doi: 10.1007/s10529-013-1416-  
676 y
- 677 Wu W, Xing EP, Myers C, Mian IS, Bissell MJ. 2005. Evaluation of normalization methods  
678 for cDNA microarray data by k-NN classification. *BMC Bioinformatics* 6, 191. doi:  
679 10.1186/1471-2105-6-191



- 680 Yao J, Rock CO. 2013. Phosphatidic acid synthesis in bacteria. *Biochim Biophys Acta*. 1831,  
681 495-502. doi: 10.1016/j.bbaliip.2012.08.018
- 682 Yu Q, Bai L, Zhou X, Deng Z. 2012. Inactivation of the positive LuxR-type oligomycin  
683 biosynthesis regulators OlmRI and OlmRII increases avermectin production in  
684 *Streptomyces avermitilis*. *Chinese Sci. Bull.* 57, 869-876. doi: 10.1007/s11434-011-4865-  
685 5
- 686 Zhang X, Chen W, Zhang Y, Jiang L, Chen Z, Wen Y, Li J. 2012. Deletion of *ku* homologs  
687 increases gene targeting frequency in *Streptomyces avermitilis*. *J Ind Microbiol Biotechnol*  
688 39, 917-925. doi: 10.1007/s10295-012-1097-x.
- 689 Zhou ZX, Xu QQ, Bu QT, Liu SP, Yu P, Li YQ. 2015. Transcriptome-guided identification of  
690 SprA as a pleiotropic regulator in *Streptomyces chattanoogensis*. *Appl Microbiol*  
691 *Biotechnol* 99:1287-1298. doi: 10.1007/s00253-014-6132-6
- 692 Zhu J, Sun D, Liu W, Chen Z, li J, Wen Y. 2016. AvaR2, a pseudo c-butyrolactone receptor  
693 homologue from *Streptomyces avermitilis*, is a pleiotropic repressor of avermectin and  
694 avenolide biosynthesis and cell growth. *Mol Microbiol* 102, 562-578.  
695 doi:10.1111/mmi.13479.
- 696 Zou Z, Du D, Zhang Y, Zhang J, Niu G, Tan H. 2014. A  $\gamma$ -butyrolactone-sensing  
697 activator/repressor, JadR3, controls a regulatory mini-network for jadomycin biosynthesis.  
698 *Mol Microbiol* 94, 490-505. doi: 10.1111/mmi.12752.  
699

## **Modulation of multiple gene clusters expression by a single PAS-LuxR transcriptional regulator.**

Cláudia M. Vicente<sup>a,b,c</sup>, Tamara D. Payero<sup>a,b</sup>, Antonio Rodríguez-García<sup>a,b</sup>, Eva G. Barreales<sup>a</sup>, Antonio de Pedro<sup>a</sup>, Fernando Santos-Beneit<sup>b,d</sup> and Jesús F. Aparicio<sup>a,\*</sup>

<sup>a</sup> *Area of Microbiology, Faculty of Biology, University of León, 24071 León. Spain.*

<sup>b</sup> *Institute of Biotechnology INBIOTEC, Parque Científico de León, Avda. Real, nº 1, 24006 León, Spain.*

<sup>c</sup> *Present address: TBI, CNRS, INRA, INSA, Université de Toulouse, Toulouse, France*

<sup>d</sup> *Present address: Institute of Sustainable Processes, University of Valladolid. Spain.*

\*Corresponding author. Tel:+34-987-293420; Fax:+34-987-291409; e-mail: [jesus.aparicio@unileon.es](mailto:jesus.aparicio@unileon.es)

**Figures 1-3, Tables 1 and 3**

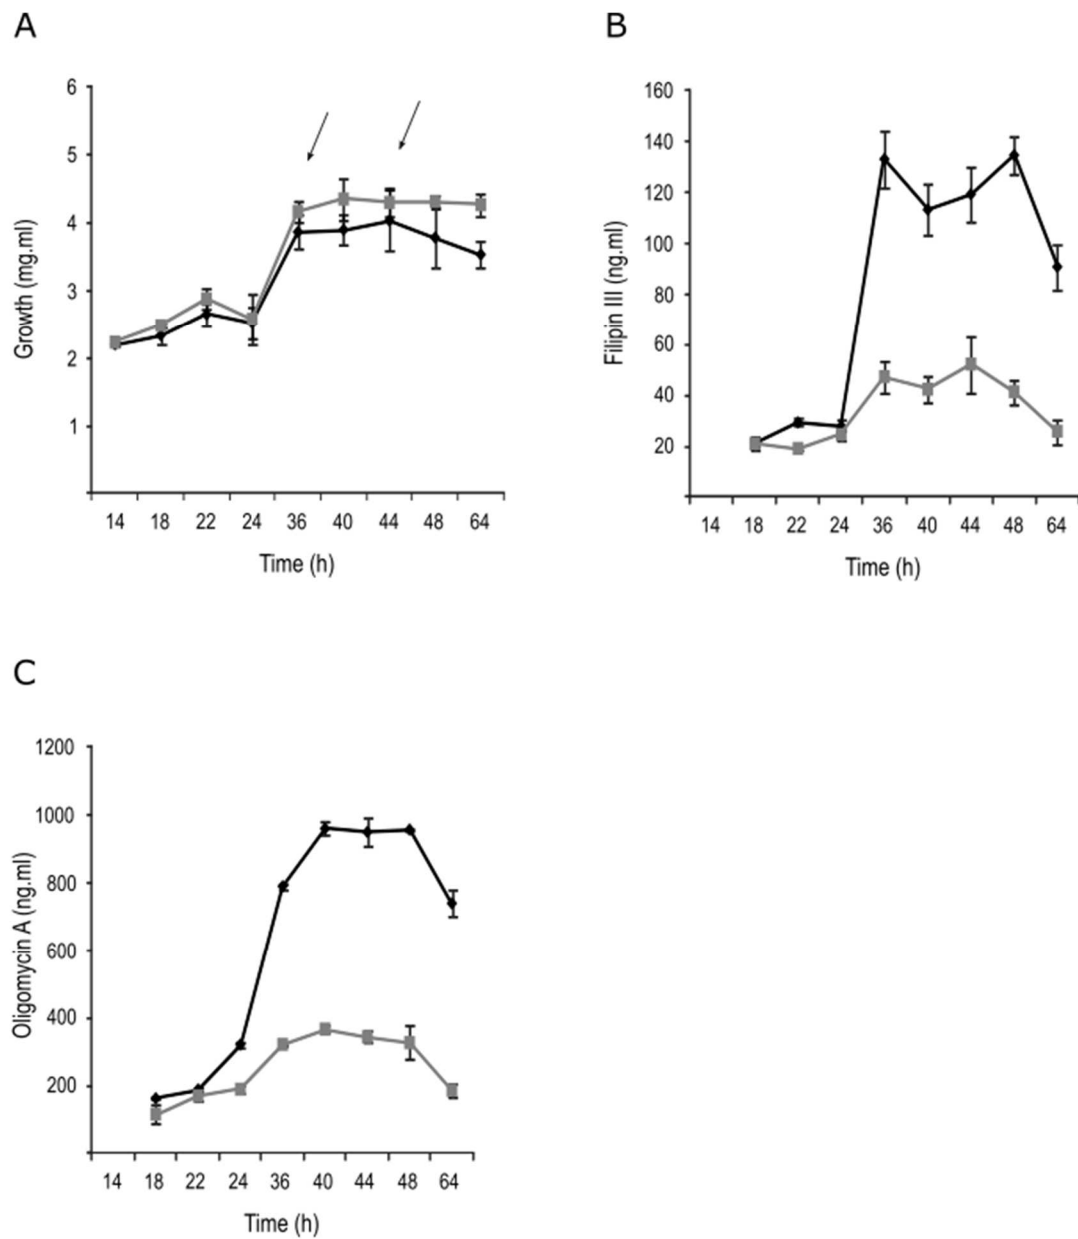

**Fig. 1.- Growth and antibiotic production in YEME medium without sucrose.** Strains *S. avermitilis* wt (black), and  $\Delta pteF$  mutant (gray). A) Growth curves. B) Filipin production. (C) Oligomycin production. Arrows indicate RNA samples harvesting times.

A

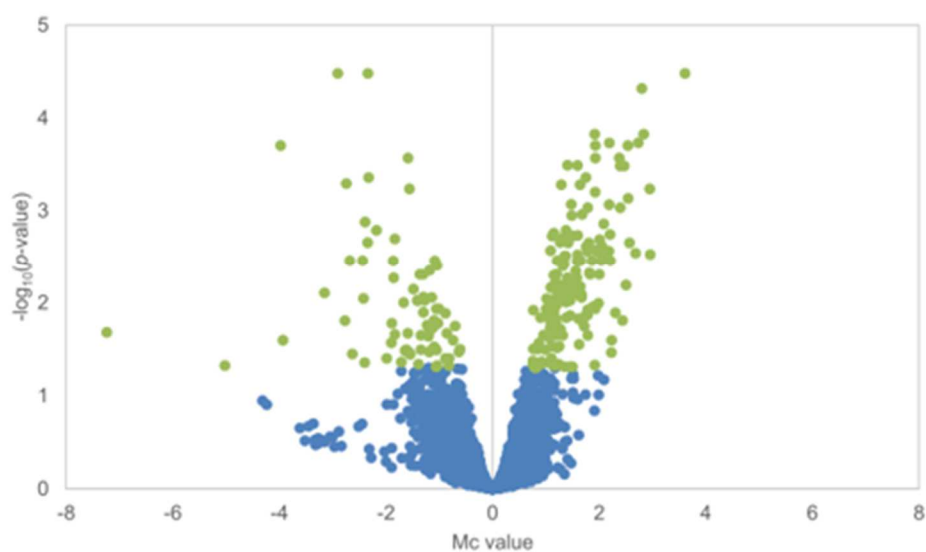

B

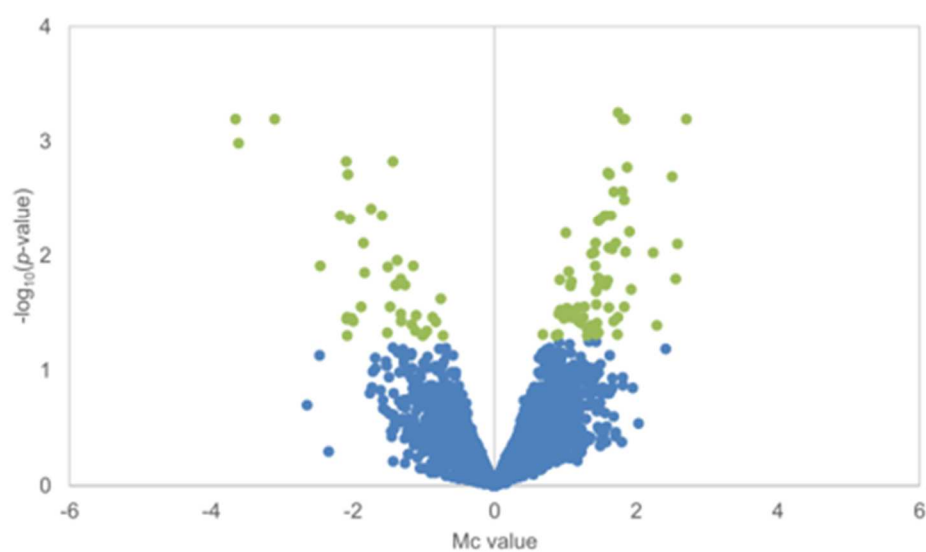

**Fig. 2.- Differentially expressed genes in the mutant strain  $\Delta pteF$ .** Volcano plots show differential gene expression distribution during exponential phase (A) and stationary phase (B). Statistically significant genes are shown in green ( $\log_{10} p\text{-value} \geq 1.3$ ).

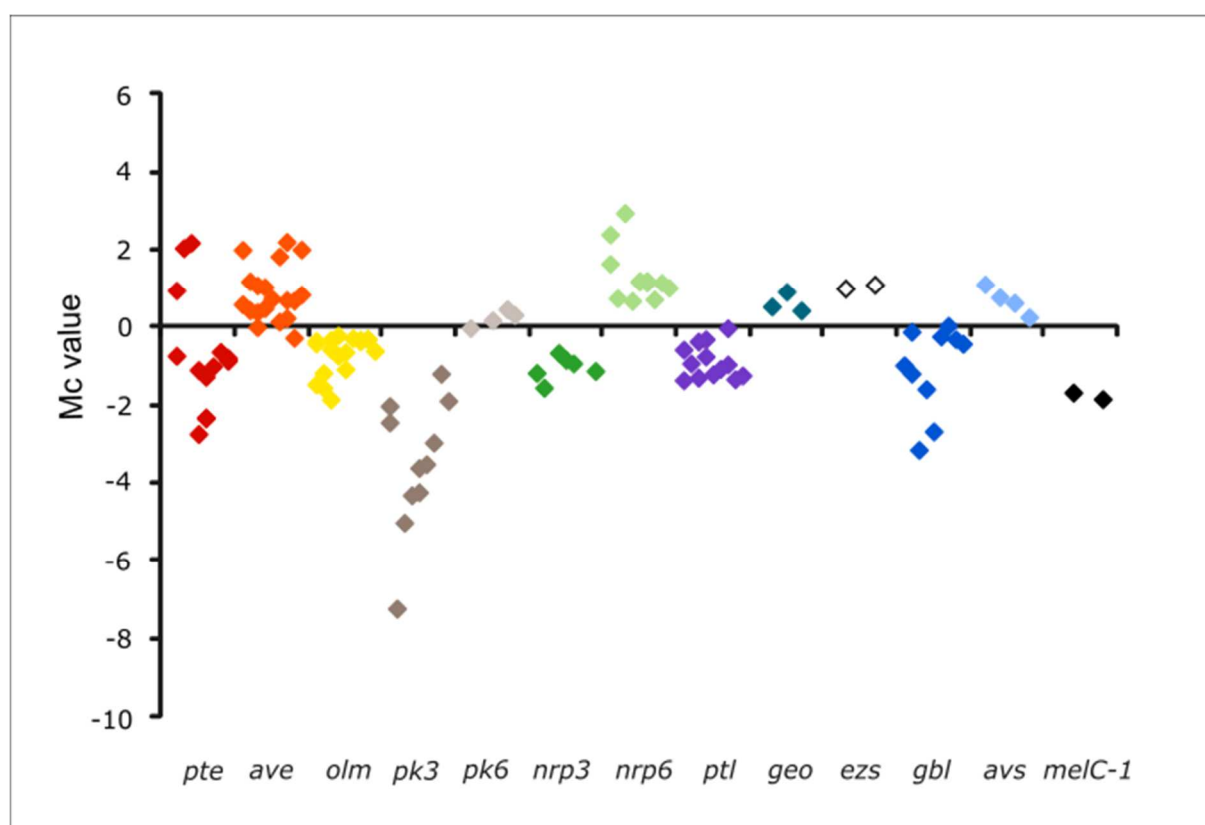

**Fig. 3.- Transcription profiles of secondary metabolite gene clusters genes in *S. avermitilis*  $\Delta pteF$ .** Only clusters whose transcription was affected by the mutation are included. All the genes of a given cluster are shown in the plot, including regulatory genes. Coloured squares are the plots of differential transcription values for individual genes in the mutant. *pte*, filipin (red); *ave*, avermectin (orange); *olm*, oligomycin (yellow); *pk*, polyketide (gray); *nrp*, non-ribosomal peptide (green); *ptl*, neopentalenoketolactone (purple); *geo*, geosmin (teal); *ezs*, albaflavenol/albaflavenone (white); *gbl*,  $\gamma$ -butyrolactone (dark blue); *avs*, vibrioferrin-like siderophore (light blue); *melC-1*, melanin (black).

**Table 1: Differential transcription and functional classification of genes affected by *pteF* deletion.**

|                                                                              | <b>Genes underexpressed<sup>1</sup></b> | <b>Genes overexpressed<sup>a</sup></b> | <b>Total</b> |
|------------------------------------------------------------------------------|-----------------------------------------|----------------------------------------|--------------|
| Exponential phase (t1)                                                       | 63                                      | 145                                    | <b>208</b>   |
| Stationary phase (t2)                                                        | 35                                      | 64                                     | <b>99</b>    |
|                                                                              | <b>Identified genes<sup>2</sup></b>     |                                        |              |
| Function                                                                     | t1                                      | t2                                     |              |
| Genetic information- and protein-processing, and amino acid metabolism       | 20 (7 ↓; 13 ↑)                          | 11 (5 ↓; 6 ↑)                          |              |
| Nucleotide and vitamin metabolism, DNA replication, recombination and repair | 16 (4 ↓; 12 ↑)                          | 4 (1 ↓; 3 ↑)                           |              |
| Carbohydrate metabolism                                                      | 13 (3 ↓; 10 ↑)                          | 1 (1 ↓)                                |              |
| Lipid metabolism                                                             | 8 (1 ↓; 7 ↑)                            | 4 (4 ↑)                                |              |
| Energy production                                                            | 2 (2 ↓)                                 | 1 (1 ↓)                                |              |
| Transport and external signals processing                                    | 20 (12 ↓; 8 ↑)                          | 8 (4 ↓; 4 ↑)                           |              |
| Cell envelope biosynthesis and morphological differentiation                 | 9 (4 ↓; 5 ↑)                            | 5 (4 ↓; 1 ↑)                           |              |
| Regulation                                                                   | 27 (12 ↓; 15 ↑)                         | 12 (3 ↓; 9 ↑)                          |              |
| Secondary metabolism                                                         | 60 (34 ↓; 26 ↑)                         | 6 (2 ↓; 4 ↑)                           |              |
| Miscellaneous                                                                | 38 (11 ↓; 27 ↑)                         | 19 (1 ↓; 18 ↑)                         |              |

<sup>1</sup> Only statistically significant genes with a fold-change value equal higher to +/-2 are included.

<sup>2</sup> All identified genes were accounted for

**Table 2: Transcriptional values of genes belonging to differentially expressed secondary metabolite gene clusters in *S. avermitilis*  $\Delta$ *pteF* when compared to its parental strain.**

Differential transcription values *Mc* were obtained by subtracting mutant *Mg* values from parental strain *Mg* values. Only clusters whose transcription was affected by the mutation are included. The *p*-values are indicated in bold type when found statistically significant (see Materials and methods). For simplicity, designations “putative” have been removed.

| Gene                                         | Description   | Mc                                                                         | Corrected p value | p value       |               |
|----------------------------------------------|---------------|----------------------------------------------------------------------------|-------------------|---------------|---------------|
| <b>Filipin cluster (<i>pte</i>)</b>          |               |                                                                            |                   |               |               |
| SAV407                                       | <i>pteH</i>   | thioesterase                                                               | 0.95              | 0.1395        | <b>0.0076</b> |
| SAV408                                       | <i>pteG</i>   | cholesterol oxidase                                                        | <b>2.05</b>       | <b>0.0025</b> | 0.0000        |
| SAV410                                       | <i>pteR</i>   | SARP-family transcriptional regulator                                      | <b>2.18</b>       | <b>0.0009</b> | 0.0000        |
| SAV411                                       | <i>pteE</i>   | ferredoxin                                                                 | <b>-1.10</b>      | 0.2533        | <b>0.0233</b> |
| SAV412                                       | <i>pteD</i>   | cytochrome P450 monooxygenase                                              | <b>-2.74</b>      | <b>0.0005</b> | 0.0000        |
| SAV413                                       | <i>pteC</i>   | cytochrome P450 monooxygenase                                              | <b>-2.33</b>      | <b>0.0004</b> | 0.0000        |
| SAV414                                       | <i>pteB</i>   | dehydrogenase                                                              | <b>-2.34</b>      | <b>0.0000</b> | 0.0000        |
| SAV415                                       | <i>pteA5</i>  | modular polyketide synthase                                                | <b>-1.01</b>      | 0.1136        | <b>0.0054</b> |
| SAV416                                       | <i>pteA4</i>  | modular polyketide synthase                                                | <b>-1.28</b>      | <b>0.0095</b> | 0.0002        |
| SAV417                                       | <i>pteA3</i>  | modular polyketide synthase                                                | -0.64             | 0.3514        | <b>0.0457</b> |
| SAV418                                       | <i>pteA2</i>  | modular polyketide synthase                                                | -0.87             | 0.3639        | 0.0506        |
| SAV419                                       | <i>pteA1</i>  | modular polyketide synthase                                                | -0.80             | 0.4388        | 0.0752        |
| <b>Non-ribosomal peptide-6 (<i>nrp6</i>)</b> |               |                                                                            |                   |               |               |
| SAV600                                       | <i>fecC1</i>  | ABC transporter iron(III)/siderophore transport system ATP-binding protein | <b>2.40</b>       | <b>0.0003</b> | 0.0000        |
| SAV601                                       | <i>fecD1</i>  | ABC transporter iron(III)/siderophore permease                             | 0.75              | 0.5625        | 0.1290        |
| SAV602                                       | <i>fecB</i>   | ABC transporter iron(III)/siderophore-binding protein                      | <b>2.95</b>       | <b>0.0006</b> | 0.0000        |
| SAV603                                       | <i>nrips6</i> | non-ribosomal peptide synthetase                                           | 0.68              | 0.3119        | <b>0.0342</b> |
| SAV604                                       |               | hypothetical protein                                                       | <b>1.18</b>       | <b>0.0224</b> | 0.0005        |
| SAV605                                       | <i>fadD2</i>  | acyl-CoA synthetase                                                        | <b>1.20</b>       | <b>0.0049</b> | 0.0001        |
| SAV606                                       |               | hypothetical protein                                                       | 0.71              | 0.3525        | <b>0.0464</b> |
| SAV607                                       |               | taurine catabolism dioxygenase                                             | <b>1.15</b>       | <b>0.0017</b> | 0.0000        |

|                                                               |                 |                                                     |              |               |               |
|---------------------------------------------------------------|-----------------|-----------------------------------------------------|--------------|---------------|---------------|
| <b>SAV608</b>                                                 | <i>fabC2</i>    | acyl carrier protein                                | <b>1.02</b>  | 0.1136        | <b>0.0054</b> |
| <b>SAV609</b>                                                 | <i>fabH4</i>    | 3-oxoacyl-ACP synthase III                          | <b>1.15</b>  | 0.1182        | <b>0.0058</b> |
| <b>SAV610</b>                                                 |                 | MFS transporter protein                             | <b>1.19</b>  | <b>0.0166</b> | 0.0004        |
| <b>SAV611</b>                                                 |                 | beta-hydroxylase                                    | <b>1.64</b>  | <b>0.0005</b> | 0.0000        |
| <b>Avermectin cluster (<i>ave</i>)</b>                        |                 |                                                     |              |               |               |
| <b>SAV935</b>                                                 | <i>aveR</i>     | LuxR-family transcriptional regulator               | <b>2.00</b>  | <b>0.0049</b> | 0.0001        |
| <b>SAV936</b>                                                 | <i>aveF</i>     | C-5 ketoreductase                                   | 0.59         | 0.6016        | 0.1518        |
| <b>SAV937</b>                                                 | <i>aveD</i>     | C5-O-methyltransferase                              | 0.43         | 0.6148        | 0.1603        |
| <b>SAV938</b>                                                 | <i>aveA1</i>    | type I polyketide synthase                          | <b>1.18</b>  | 0.1820        | <b>0.0122</b> |
| <b>SAV939</b>                                                 | <i>aveA2</i>    | type I polyketide synthase                          | 0.39         | 0.7264        | 0.2537        |
| <b>SAV940</b>                                                 | <i>aveC</i>     |                                                     | 0.00         | 0.9993        | 0.9950        |
| <b>SAV941</b>                                                 | <i>aveE</i>     | cytochrome P450 monooxygenase                       | <b>1.04</b>  | 0.1376        | <b>0.0074</b> |
| <b>SAV942</b>                                                 | <i>aveA3</i>    | type I polyketide synthase                          | 0.49         | 0.6328        | 0.1725        |
| <b>SAV943</b>                                                 | <i>aveA4</i>    | type I polyketide synthase                          | 0.73         | 0.4435        | 0.0764        |
| <b>SAV944<sup>3</sup></b>                                     | <i>orf-1</i>    | reductase                                           | 0.14         | 0.9330        | 0.6990        |
| <b>SAV945</b>                                                 | <i>aveBI</i>    | dTDP-L-oleandrose transferase (glycosyltransferase) | 0.70         | 0.6052        | 0.1543        |
| <b>SAV946</b>                                                 | <i>aveBII</i>   | dTDP-glucose 4.6-dehydratase                        | 0.23         | 0.8027        | 0.3477        |
| <b>SAV947</b>                                                 | <i>aveBIII</i>  | glucose-1-phosphate thymidyltransferase             | <b>1.08</b>  | 0.2027        | <b>0.0154</b> |
| <b>SAV948</b>                                                 | <i>aveBIV</i>   | dTDP-4-keto-6-deoxy-L-hexose 4-reductase            | -0.28        | 0.8828        | 0.5032        |
| <b>SAV949</b>                                                 | <i>aveBV</i>    | dTDP-4-keto-6-deoxyhexose 3.5-epimerase             | 0.68         | 0.5387        | 0.1160        |
| <b>SAV950</b>                                                 | <i>aveBVI</i>   | dTDP-4-keto-6-deoxy-L-hexose 2.3-dehydratase        | 0.84         | 0.4308        | 0.0711        |
| <b>SAV951</b>                                                 | <i>aveBVII</i>  | dTDP-6-deoxy-L-hexose 3-O-methyltransferase         | <b>2.01</b>  | <b>0.0020</b> | 0.0000        |
| <b>SAV952</b>                                                 | <i>aveBVIII</i> | dTDP-4-keto-6-deoxy-L-hexose 2.3-reductase          | <b>1.83</b>  | <b>0.0049</b> | 0.0001        |
| <b>SAV953</b>                                                 | <i>aveG</i>     | thioesterase                                        | <b>2.20</b>  | <b>0.0018</b> | 0.0000        |
| <b>Melanin cluster (<i>melC-1</i>)<sup>4</sup></b>            |                 |                                                     |              |               |               |
| <b>SAV1136</b>                                                | <i>melC1</i>    | tyrosinase co-factor protein                        | <b>-1.68</b> | 0.0776        | <b>0.0015</b> |
| <b>SAV1137</b>                                                | <i>melC2</i>    | tyrosinase                                          | <b>-1.85</b> | <b>0.0078</b> | 0.0000        |
| <b><math>\gamma</math>-butyrolactone cluster (<i>gbl</i>)</b> |                 |                                                     |              |               |               |

<sup>3</sup> Not involved in avermectin biosynthesis

<sup>4</sup> Values from stationary phase (t2) analysis



|                                          |               |                                          |              |               |               |
|------------------------------------------|---------------|------------------------------------------|--------------|---------------|---------------|
| SAV2266                                  | <i>avaC</i>   | phosphatase                              | -0.98        | 0.0794        | <b>0.0030</b> |
| SAV2267                                  | <i>avaB</i>   | oxidoreductase                           | <b>-1.20</b> | 0.2777        | <b>0.0279</b> |
| SAV2268                                  | <i>avaL2</i>  | TetR-family transcriptional regulator    | <b>-3.15</b> | <b>0.0078</b> | 0.0001        |
| SAV2269                                  | <i>avaA</i>   | gamma-butyrolactone biosynthesis protein | <b>-1.59</b> | 0.1456        | <b>0.0083</b> |
| SAV2270                                  | <i>avaL1</i>  | TetR-family transcriptional regulator    | <b>-2.68</b> | <b>0.0035</b> | 0.0000        |
| <b>Polyketide-3 cluster (<i>pk3</i>)</b> |               |                                          |              |               |               |
| SAV2272                                  |               | hypothetical protein                     | <b>-2.45</b> | 0.2000        | <b>0.0150</b> |
| SAV2273                                  |               | isomerase                                | <b>-7.24</b> | <b>0.0208</b> | 0.0005        |
| SAV2274                                  |               | secreted protein                         | <b>-5.02</b> | <b>0.0473</b> | 0.0014        |
| SAV2275                                  |               | transmembrane efflux protein             | <b>-4.32</b> | 0.1124        | <b>0.0053</b> |
| SAV2276                                  |               | 3-oxoacyl-ACP synthase III               | <b>-4.24</b> | 0.1242        | <b>0.0063</b> |
| SAV2277                                  |               | thioesterase                             | <b>-3.62</b> | 0.2222        | <b>0.0183</b> |
| SAV2278                                  |               | F420-dependent dehydrogenase             | <b>-3.52</b> | 0.3037        | <b>0.0327</b> |
| SAV2279                                  |               | acyl-CoA synthetase                      | <b>-2.97</b> | 0.3522        | <b>0.0462</b> |
| SAV2280                                  | <i>pks3-1</i> | modular polyketide synthase              | <b>-1.20</b> | 0.6288        | 0.1702        |
| SAV2281                                  | <i>pks3-2</i> | modular polyketide synthase              | <b>-1.90</b> | 0.5893        | 0.1436        |
| SAV2282                                  | <i>pks3-3</i> | acyl carrier protein                     | <b>-2.03</b> | 0.3974        | 0.0593        |
| <b>Oligomycin cluster (<i>olm</i>)</b>   |               |                                          |              |               |               |
| SAV2890                                  | <i>ccrA1</i>  | crotonyl-CoA reductase                   | -0.42        | 0.4368        | 0.0743        |
| SAV2891                                  |               | hypothetical protein                     | <b>-1.18</b> | 0.2280        | <b>0.0193</b> |
| SAV2892                                  | <i>olmA4</i>  | modular polyketide synthase              | -0.33        | 0.4760        | 0.0913        |
| SAV2893                                  | <i>olmA5</i>  | modular polyketide synthase              | -0.22        | 0.6421        | 0.1789        |
| SAV2894                                  | <i>olmB</i>   | cytochrome P450 monooxygenase            | <b>-1.09</b> | 0.1512        | <b>0.0087</b> |
| SAV2895                                  | <i>olmA7</i>  | modular polyketide synthase              | -0.64        | 0.0746        | <b>0.0028</b> |
| SAV2896                                  | <i>olmA6</i>  | modular polyketide synthase              | -0.74        | 0.1443        | <b>0.0080</b> |
| SAV2897                                  | <i>olmA3</i>  | modular polyketide synthase              | -0.32        | 0.3610        | <b>0.0493</b> |
| SAV2898                                  | <i>olmA2</i>  | modular polyketide synthase              | -0.31        | 0.5785        | 0.1377        |
| SAV2899                                  | <i>olmA1</i>  | modular polyketide synthase              | -0.61        | 0.1817        | <b>0.0121</b> |
| SAV2900                                  |               | P450-like protein                        | -0.57        | 0.2474        | <b>0.0224</b> |
| SAV2901                                  | <i>olmRII</i> | LuxR-family transcriptional regulator    | <b>-1.47</b> | 0.0712        | <b>0.0026</b> |

|                                                        |                 |                                                            |              |               |               |
|--------------------------------------------------------|-----------------|------------------------------------------------------------|--------------|---------------|---------------|
| SAV2902                                                | <i>olmRI</i>    | LuxR-family transcriptional regulator                      | <b>-1.56</b> | <b>0.0006</b> | 0.0000        |
| SAV2903                                                | <i>olmC</i>     | Thioesterase                                               | <b>-1.86</b> | 0.1235        | <b>0.0062</b> |
| <b>Neopentalenolactone cluster (<i>ptl</i>)</b>        |                 |                                                            |              |               |               |
| SAV2989                                                |                 | MarR-family transcriptional regulator                      | <b>-1.06</b> | <b>0.0487</b> | 0.0015        |
| SAV2990                                                | <i>gap1</i>     | glyceraldehyde-3-phosphate dehydrogenase                   | <b>-1.36</b> | 0.2469        | <b>0.0222</b> |
| SAV2991                                                | <i>ptlH</i>     | 1-deoxypentalenic acid 11-beta hydroxylase                 | -0.93        | 0.1529        | <b>0.0089</b> |
| SAV2992                                                | <i>ptlG</i>     | transmembrane efflux protein                               | -0.37        | 0.9068        | 0.5988        |
| SAV2993                                                | <i>ptlF</i>     | 1-deoxy-11beta-hydroxypentalenic acid dehydrogenase        | -0.76        | 0.2639        | <b>0.0251</b> |
| SAV2994                                                | <i>ptlE</i>     | Baeyer-Villiger monooxygenase                              | <b>-1.30</b> | <b>0.0087</b> | 0.0001        |
| SAV2995                                                | <i>ptlD</i>     | dioxygenase                                                | <b>-1.21</b> | 0.0962        | <b>0.0041</b> |
| SAV2996                                                | <i>ptlC</i>     | hypothetical protein                                       | <b>-1.07</b> | 0.5367        | 0.1153        |
| SAV2997                                                | <i>ptlB</i>     | farnesyl diphosphate synthase                              | -0.96        | 0.5690        | 0.1322        |
| SAV2998                                                | <i>ptlA</i>     | pentalenene synthase                                       | <b>-1.34</b> | 0.5592        | 0.1269        |
| SAV2999                                                | <i>ptlI</i>     | pentalenene C13 hydroxylase; cytochrome P450               | <b>-1.24</b> | 0.4943        | 0.0993        |
| SAV3000                                                | <i>ptlR</i>     | AraC-family transcriptional regulator                      | -0.58        | 0.5379        | 0.1158        |
| SAV3001                                                | <i>ptlJ</i>     | lyase                                                      | -0.31        | 0.6109        | 0.1579        |
| SAV3002                                                | <i>ptlL</i>     | hypothetical protein                                       | -0.03        | 0.9754        | 0.8867        |
| <b>Albaflavenol/albaflavenone cluster (<i>ezs</i>)</b> |                 |                                                            |              |               |               |
| SAV3031                                                | <i>cyp14</i>    | epi-isozizaene hydroxylase (cytochrome P450 monooxygenase) | <b>1.00</b>  | 0.2918        | <b>0.0301</b> |
| SAV3032                                                | <i>ezs</i>      | epi-isozizaene synthase (sesquiterpene cyclase)            | <b>1.10</b>  | 0.1621        | <b>0.0097</b> |
| <b>Non-ribosomal peptide-3 cluster (<i>nrp3</i>)</b>   |                 |                                                            |              |               |               |
| SAV3155                                                |                 | MbtH-like protein                                          | <b>-1.18</b> | 0.2696        | <b>0.0261</b> |
| SAV3156                                                | <i>nrips3-1</i> | non-ribosomal peptide synthetase                           | <b>-1.56</b> | 0.0867        | <b>0.0035</b> |
| SAV3157                                                |                 | export protein                                             | -0.66        | 0.6407        | 0.1773        |
| SAV3158                                                | <i>nrips3-2</i> | non-ribosomal peptide synthetase                           | -0.84        | 0.6149        | 0.1623        |
| SAV3159                                                | <i>nrips3-3</i> | non-ribosomal peptide synthetase                           | -0.93        | 0.5290        | 0.1123        |
| SAV3160                                                |                 | aminotransferase                                           | <b>-1.13</b> | 0.4384        | 0.0749        |
| SAV3161                                                | <i>dapF2</i>    | diaminopimelate epimerase                                  | <b>-1.03</b> | 0.5045        | <b>0.1029</b> |
| SAV3162                                                |                 | hypothetical protein                                       | <b>-1.52</b> | 0.1668        | <b>0.0101</b> |

|                                                                |              |                                           |              |               |               |
|----------------------------------------------------------------|--------------|-------------------------------------------|--------------|---------------|---------------|
| <b>SAV3163</b>                                                 |              | hypothetical protein                      | <b>-1.24</b> | 0.3227        | <b>0.0384</b> |
| <b>SAV3164</b>                                                 |              | hypothetical protein                      | <b>-1.59</b> | <b>0.0003</b> | 0.0000        |
| <b>Polyketide-4 cluster (<i>pk4</i>)</b>                       |              |                                           |              |               |               |
| <b>SAV7184</b>                                                 | <i>pks4</i>  | modular polyketide synthase               | <b>-3.22</b> | 0.2980        | <b>0.0315</b> |
| <b>SAV7185</b>                                                 |              | UDP-glucose:sterol<br>glucosyltransferase | <b>-3.05</b> | 0.2753        | <b>0.0271</b> |
| <b>SAV7186</b>                                                 | <i>cyp26</i> | cytochrome P450 hydroxylase               | <b>-2.88</b> | 0.2419        | <b>0.0213</b> |
| <b>Polyhydroxycarboxylate siderophore cluster (<i>avs</i>)</b> |              |                                           |              |               |               |
| <b>SAV7320</b>                                                 | <i>avsA</i>  | siderophore synthetase component          | <b>1.11</b>  | <b>0.0295</b> | 0.0007        |
| <b>SAV7321</b>                                                 | <i>avsB</i>  | siderophore synthetase component          | 0.77         | 0.2474        | <b>0.0223</b> |
| <b>SAV7322</b>                                                 | <i>avsC</i>  | siderophore synthetase component          | 0.63         | 0.4654        | 0.0862        |
| <b>SAV7323</b>                                                 | <i>avsD</i>  | diaminopimelate decarboxylase             | 0.25         | 0.8125        | 0.3606        |
